# Supplementary material
Source: publisher figshare collection journal article supplement (https://acs.figshare.com/ndownloader/files/9036169)
Supplement: Supplementary file 1 [file 9036169]

Supporting information

## Response Characteristics of Hydrogen Sensors Based on PMMA-Membrane-Coated Palladium Nanoparticle Films

Minrui Chen,<sup>†,‡</sup> Peng Mao,<sup>//,⊥</sup> Yuyuan Qin,<sup>‡</sup> Jue Wang,<sup>‡</sup> Bo Xie,<sup>\*,†</sup> Xiuzhang Wang,<sup>†</sup> Deyan Han,<sup>§</sup> Guo-hong Wang,<sup>§</sup> Fengqi Song,<sup>‡</sup> Min Han,<sup>‡</sup> Jun-Ming Liu<sup>‡</sup> and Guanghou Wang<sup>‡</sup>

<sup>†</sup>Institute for Advanced Materials, Hubei Normal University, Huangshi 435002, P. R. China

<sup>‡</sup>National Laboratory of Solid State Microstructures, Nanjing University, Nanjing 210093, P. R. China

<sup>§</sup>Hubei Collaborative Innovation Center for Rare Metal Chemistry, Hubei Normal University, Huangshi 435002, P. R. China

<sup>//</sup>Nanoscale Physics Research Laboratory, School of Physics and Astronomy, University of Birmingham, Birmingham B15 2TT, United Kingdom

<sup>⊥</sup>College of Electronic Science and Engineering, Nanjing University of Posts and Telecommunications, Nanjing 210023, P. R. China

E-mail: xiebo@hbnu.edu.cn

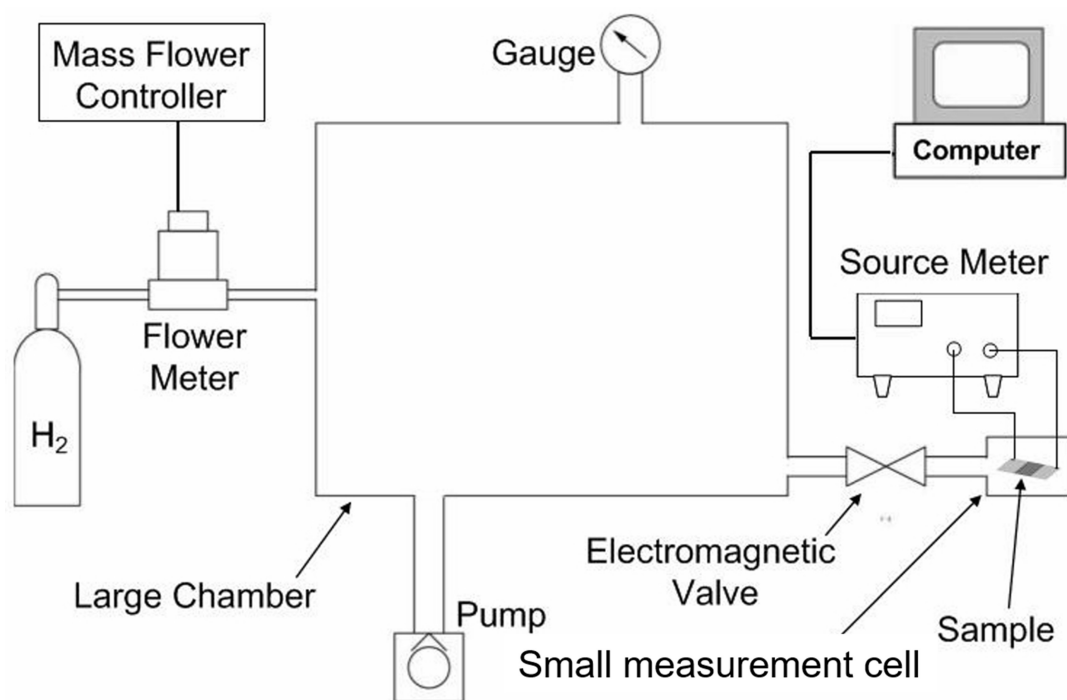

**Figure S1. Schematic diagram of the measurement configuration used for response time measurements.**

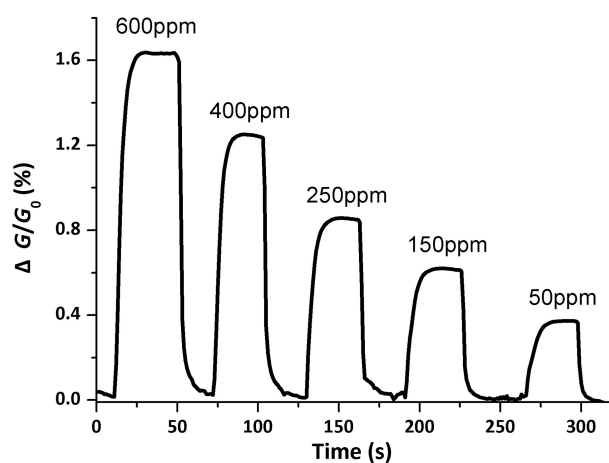

**Figure S2.** Response curve for the Pd NP film to 50–600 ppm  $H_2$ /air mixture loading and deloading cycles after PMMA coating. The concentration of  $H_2$  for each hydrogen loading is marked at the top of each response peak.
